# Supplementary material
Source: Elsevier journal article supplement (https://www.sciencedirect.com/science/article/pii/S0120563318300810)
Supplement: mmc1 [file S0120563318300810:mmc1.docx]

**
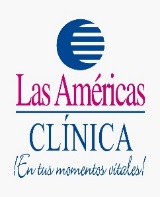
**
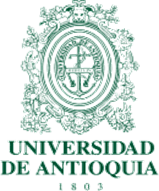

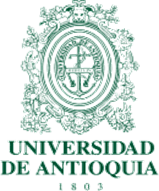


Anexo 1 Versión del Índice de estado de actividad de Duke – DASI para pacientes con falla cardíaca en Medellín – Colombia[[1]](#footnote-1)

|  |
| --- |

Código

Estas son algunas preguntas relacionadas con la dificultad para realizar las actividades diarias en las **DOS ULTIMAS SEMANAS**. Por favor marque con una “X” la respuesta correcta.

|  |  | Lo hizo, sin dificultad | Lo hizo, Pero con dificultad | No lo hizo por problemas de salud cardiovascular | No lo hizo por cualquier otra razón |
| --- | --- | --- | --- | --- | --- |
| 1. | ¿Se defiende solo (comer, vestirse, bañarse o usar el baño)? |  |  |  |  |
| 2. | ¿Puede caminar dentro de su casa? |  |  |  |  |
| 3. | ¿Puede caminar una o dos cuadras en plano? |  |  |  |  |
| 4. | ¿Puede subir unas escalas o una loma? |  |  |  |  |
| 5. | ¿Puede correr una distancia corta? |  |  |  |  |
| 6. | ¿Puede hacer labores domésticas sencillas, como sacudir o lavar los platos? |  |  |  |  |
| 7. | ¿Puede hacer labores domésticas más complejas, como aspirar, barrer o cargar mercado? |  |  |  |  |
| 8. | ¿Puede hacer labores domésticas pesadas como estregar pisos o levantar y mover muebles pesados? |  |  |  |  |
| 9. | ¿Puede hacer labores en el jardín como barrer hojas, sacar maleza o cortar el césped? |  |  |  |  |
| 10. | ¿Puede tener relaciones sexuales? |  |  |  |  |
| 11. | ¿Puede participar en actividades recreativas como: caminar rápido, montar bicicleta despacio o jugar dobles de tenis? |  |  |  |  |
| 12. | ¿Puede participar en deportes fatigantes como: nadar, jugar baloncesto, jugar fútbol, correr o montar rápido en bicicleta? |  |  |  |  |

Anexo 2 Etiquetas usadas en las tablas de resultados

|  | **Preguntas del cuestionario** | **Etiquetas** |
| --- | --- | --- |
| 1 | ¿Se defiende solo (comer, vestirse, bañarse o usar el baño)? | Autocuidado |
| 2 | ¿Puede caminar dentro de su casa? | Caminar en casa |
| 3 | ¿Puede caminar una o dos cuadras en plano? | Caminar 1 o 2 cuadras |
| 4 | ¿Puede subir unas escalas o una loma? | Subir escalas o loma |
| 5 | ¿Puede correr una distancia corta? | Correr distancias cortas |
| 6 | ¿Puede hacer labores domésticas sencillas como sacudir o lavar platos? | Labores domésticas sencillas |
| 7 | ¿Puede hacer labores domésticas más complejas, como aspirar, barrer o cargar mercado? | Labores domésticas complejas |
| 8 | ¿Puede hacer labores domésticas pesadas como estregar pisos o levantar y mover muebles pesados? | Labores domésticas pesadas |
| 9 | ¿Puede hacer labores en el jardín como barrer hojas, sacar maleza o cortar el césped? | Labores de jardín |
| 10 | ¿Puede tener relaciones sexuales? | Relaciones sexuales |
| 11 | ¿Puede participar en actividades recreativas como: caminar rápido, montar bicicleta despacio o jugar dobles tenis? | Actividades recreativas |
| 12 | ¿Puede participar en deportes fatigantes como: nadar, jugar baloncesto, jugar futbol, correr o montar rápido en bicicleta? | Deportes fatigantes |

Anexo 3 Calificación del DASI para pacientes con falla cardíaca en Medellín – Colombia

Puntos para asignar a las respuestas “Si, sin dificultad”

|  | **Actividad** | **Peso** |
| --- | --- | --- |
| 1 | ¿Se defiende solo (comer, vestirse, bañarse o usar el baño)? | 2,75 |
| 2 | ¿Puede caminar dentro de su casa? | 1,75 |
| 3 | ¿Puede caminar una o dos cuadras en plano? | 2,75 |
| 4 | ¿Puede subir unas escalas o una loma? | 5,50 |
| 5 | ¿Puede correr una distancia corta? | 8,00 |
| 6 | ¿Puede hacer labores domésticas sencillas como sacudir o lavar platos? | 2,70 |
| 7 | ¿Puede hacer labores domésticas más complejas, como aspirar, barrer o cargar mercado? | 3,50 |
| 8 | ¿Puede hacer labores domésticas pesadas como estregar pisos o levantar y mover muebles pesados? | 8,00 |
| 9 | ¿Puede hacer labores en el jardín como barrer hojas, sacar maleza o cortar el césped? | 4,50 |
| 10 | ¿Puede tener relaciones sexuales? | 5,25 |
| 11 | ¿Puede participar en actividades recreativas como: caminar rápido, montar bicicleta despacio o jugar dobles tenis? | 6,00 |
| 12 | ¿Puede participar en deportes fatigantes como: nadar, jugar baloncesto, jugar futbol, correr o montar rápido en bicicleta? | 7,50 |

1. Lugo Agudelo Luz-Helena y coinvestigadores. Grupo Rehabilitación en Salud, Universidad de Antioquia y Clínica Las Américas. [↑](#footnote-ref-1)
